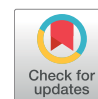

# Disclosures: *Standards of Medical Care in Diabetes—2022*

*Diabetes Care* 2022;45(Suppl. 1):S256–S258 | <https://doi.org/10.2337/dc22-SDIS>

**Committee members disclosed the following financial or other conflicts of interest (COI) covering the period 12 months before December 2021**

| Member                                      | Employment                                                      | Research grant                                                            | Other research support | Speakers' bureau/honoraria | Ownership interest                 | Consultant/advisory board                                                                                                                                             | Other                                                                                                                                                                                                                                                                                                                                                           |
|---------------------------------------------|-----------------------------------------------------------------|---------------------------------------------------------------------------|------------------------|----------------------------|------------------------------------|-----------------------------------------------------------------------------------------------------------------------------------------------------------------------|-----------------------------------------------------------------------------------------------------------------------------------------------------------------------------------------------------------------------------------------------------------------------------------------------------------------------------------------------------------------|
| <b>Professional Practice Committee</b>      |                                                                 |                                                                           |                        |                            |                                    |                                                                                                                                                                       |                                                                                                                                                                                                                                                                                                                                                                 |
| Boris Draznin, MD, PhD (Chair)              | University of Colorado Denver, School of Medicine               | None                                                                      | None                   | None                       | None                               | None                                                                                                                                                                  | eDoctate (unpaid professional education)                                                                                                                                                                                                                                                                                                                        |
| Vanita R. Aroda, MD                         | Brigham and Women's Hospital<br>Faculty, Harvard Medical School | Applied Therapeutics#, Eli Lilly#, Fractyl#, Novo Nordisk#                | None                   | None                       | Janssen (spouse employee benefits) | Applied Therapeutics#, Novo Nordisk*#, Pfizer, Sanofi                                                                                                                 | Janssen Pharmaceutical Companies of Johnson & Johnson (spouse Sandip Datta, MD, Senior Director, Translational Sciences, Immunology, May 2020 to present)<br>Consultant/Educational Activities: American College of Cardiology, American Diabetes Association, Cardiometabolic Health Congress, Endocrine Society, Hello Diabetes Academia, PeerView, PeerVoice |
| George Bakris, MD                           | University of Chicago Medicine                                  | None                                                                      | None                   | None                       | None                               | Merck, Novo Nordisk, Bayer, KBP Biosciences, Ionis, Alnylam, AstraZeneca, Quantum Genomics, Horizon, DiaMedica Therapeutics                                           | Editor of <i>American Journal of Nephrology</i>                                                                                                                                                                                                                                                                                                                 |
| Gretchen Benson, RDN, LD, CDCES             | Minneapolis Heart Institute Foundation                          | None                                                                      | None                   | None                       | None                               | None                                                                                                                                                                  | None                                                                                                                                                                                                                                                                                                                                                            |
| Florence M. Brown, MD                       | Joslin Diabetes Center, Inc.                                    | Dexcom#†                                                                  | None                   | None                       | None                               | None                                                                                                                                                                  | None                                                                                                                                                                                                                                                                                                                                                            |
| RaShaye Freeman, DNP, FNP-BC, CDCES, ADM-BC | HCA Healthcare                                                  | None                                                                      | None                   | None                       | None                               | None                                                                                                                                                                  | None                                                                                                                                                                                                                                                                                                                                                            |
| Jennifer Green, MD                          | Duke University Medical Center                                  | Boehringer Ingelheim/Lilly Alliance*#, Merck*#, Sanofi Lexicon*#, Roche*# | None                   | None                       | None                               | AstraZeneca, Boehringer Ingelheim/Lilly Alliance*, Novo Nordisk, Pfizer, Hawthorne Effect/Omada*, AstraZeneca, Jaeb Center for Health Research, Bayer, Sanofi/Lexicon | None                                                                                                                                                                                                                                                                                                                                                            |

Continued on p. S257

| Member                                                                                                                               | Employment                                                                                | Research grant                                                | Other research support | Speakers' bureau/honoraria                                            | Ownership interest                   | Consultant/advisory board                                                                                                                                                                             | Other                                                                                                                                                  |
|--------------------------------------------------------------------------------------------------------------------------------------|-------------------------------------------------------------------------------------------|---------------------------------------------------------------|------------------------|-----------------------------------------------------------------------|--------------------------------------|-------------------------------------------------------------------------------------------------------------------------------------------------------------------------------------------------------|--------------------------------------------------------------------------------------------------------------------------------------------------------|
| Elbert Huang, MD, MPH, FACP                                                                                                          | University of Chicago                                                                     | None                                                          | None                   | None                                                                  | AbbVie* (stockholder)                | Twin health, Inc.                                                                                                                                                                                     | Medical Research Analytics and Informatics Alliance—BOD<br>International Geriatric Diabetes Society—BOD                                                |
| Diana Isaacs, PharmD, BCPS, BC-ADM, CDCES                                                                                            | Cleveland Clinic                                                                          | None                                                          | None                   | Abbott, Dexcom, Medtronic, Novo Nordisk, Xeris Pharmaceuticals, Bayer | None                                 | Insulet, LifeScan, Sanofi, Lilly, DiabetesWise                                                                                                                                                        | None                                                                                                                                                   |
| Scott Kahan, MD, MPH                                                                                                                 | George Washington University, Milken Institute<br>National Center for Weight and Wellness | None                                                          | None                   | None                                                                  | None                                 | Vivus, Gelesis, Pfizer, Lilly                                                                                                                                                                         | (All without compensation)<br>The Obesity Society—BOD<br>Obesity Action Coalition—BOD<br>Endocrine Society—Advocacy and Public Outreach Core Committee |
| Jose Leon, MD, MPH                                                                                                                   | National Center for Health in Public Housing                                              | None                                                          | None                   | None                                                                  | None                                 | None                                                                                                                                                                                                  | None                                                                                                                                                   |
| Sarah K. Lyons, MD                                                                                                                   | Baylor College of Medicine/Texas Children's Hospital                                      | None                                                          | None                   | None                                                                  | Eli Lilly (parent stockholder)†      | None                                                                                                                                                                                                  | Unpaid Board Member on Epic's Pediatric Endocrinology Steering Board                                                                                   |
| Anne L. Peters, MD                                                                                                                   | Keck School of Medicine of USC                                                            | Dexcom#, Insulet#, Donates devices from Abbott Diabetes Care# | None                   | None                                                                  | Stock options: Omada Health, Teladoc | Abbott Diabetes Care, Eli Lilly, Medscape*, Novo Nordisk, Zealand, Vertex, AstraZeneca                                                                                                                | Special government employee for U.S. Food and Drug Administration                                                                                      |
| Priya Prahalad, MD, PhD                                                                                                              | Stanford Hospital and Clinics<br>Lucile Packard Children's Hospital                       | None                                                          | None                   | None                                                                  | None                                 | None                                                                                                                                                                                                  | Unpaid Board Member on Epic's Pediatric Endocrinology Steering Board                                                                                   |
| Jane E.B. Reusch, MD                                                                                                                 | University of Colorado                                                                    | None                                                          | None                   | None                                                                  | None                                 | Medtronic#                                                                                                                                                                                            | None                                                                                                                                                   |
| Deborah Young-Hyman, PhD, CDCES                                                                                                      | Behavioral Health & Social Science Research, National Institutes of Health                | None                                                          | None                   | None                                                                  | None                                 | None                                                                                                                                                                                                  | None                                                                                                                                                   |
| <b>American College of Cardiology Designated Representatives and Staff (Section 10 "Cardiovascular Disease and Risk Management")</b> |                                                                                           |                                                               |                        |                                                                       |                                      |                                                                                                                                                                                                       |                                                                                                                                                        |
| Sandeep Das, MD, MPH, FACC                                                                                                           | University of Texas Southwestern Medical Center                                           | None                                                          | None                   | <i>Circulation</i> (Associate Editor)                                 | None                                 | None                                                                                                                                                                                                  | None                                                                                                                                                   |
| Mikhail Kosiborod, MD, FACC                                                                                                          | Saint Luke's Mid America Heart Institute                                                  | AstraZeneca#, Boehringer Ingelheim#                           | AstraZeneca#           | None                                                                  | None                                 | Amgen*, Applied Therapeutics#, AstraZeneca*#, Bayer*, Boehringer Ingelheim*, Eli Lilly, Janssen*#, Merck (Diabetes & Cardiovascular)*, Novo Nordisk*#, Sanofi*, Vifor Pharma*#, Esperion Therapeutics | None                                                                                                                                                   |

Continued on p. S258

| Member                                     | Employment                    | Research grant | Other research support | Speakers' bureau/honoraria | Ownership interest | Consultant/advisory board         | Other                                                                                                                                                                       |
|--------------------------------------------|-------------------------------|----------------|------------------------|----------------------------|--------------------|-----------------------------------|-----------------------------------------------------------------------------------------------------------------------------------------------------------------------------|
| <b>American Diabetes Association Staff</b> |                               |                |                        |                            |                    |                                   |                                                                                                                                                                             |
| Mindy Saraco, MHA                          | American Diabetes Association | None           | None                   | None                       | None               | None                              | None                                                                                                                                                                        |
| Malaika I. Hill, MA                        | American Diabetes Association | None           | None                   | None                       | None               | None                              | None                                                                                                                                                                        |
| Robert A. Gabbay, MD, PhD                  | American Diabetes Association | None           | None                   | None                       | None               | Onduo*, Lark, Vida Health*        | Spouse Christi Gabbay, CHSE, Managing Director, Major Gifts and Philanthropy at American Diabetes Association<br>Endocrinologist, Joslin Diabetes Center (unpaid/volunteer) |
| Nuha Ali El Sayed, MD, MMSct†              | American Diabetes Association | None           | None                   | None                       | None               | Expert, World Health Organization | Endocrinologist, Joslin Diabetes Center (unpaid/volunteer)<br>Chair, Diabetes Education for All (unpaid)                                                                    |

Disclosures may have been identified and/or acquired after the committee members were selected for the Professional Practice Committee. BOD, board of directors.

\*≥\$10,000 per year from company to individual. #Grant or contract is to university or other employer. †Disclosure made after committee member began work on the Standards of Care 2022 update. ‡Employed by Joslin Diabetes Center prior to joining the American Diabetes Association in August 2021.
